# Supplementary material
Source: HighWire-hosted journal article supplement (https://bmjopen.bmj.com/content/12/3/e056024)
Supplement: inline-supplementary-material-1 [file inline-supplementary-material-1.pdf]

Appendix 1- PubMed Search Strategy (Literature Search performed: June 12, 2021)

| #  | Query                                                     | Filters          | Search Details                                                                                                                          | Results |
|----|-----------------------------------------------------------|------------------|-----------------------------------------------------------------------------------------------------------------------------------------|---------|
| 1  | Rabies                                                    |                  | "rabies"[MeSH Terms] OR "rabies"[All Fields]                                                                                            | 16,460  |
| 2  | Rabies                                                    | from 2010 - 2021 | ("rabies"[MeSH Terms] OR "rabies"[All Fields]) AND (2010:2021[pdat])                                                                    | 5,345   |
| 3  | Bangladesh                                                |                  | "bangladesh"[MeSH Terms] OR "bangladesh"[All Fields] OR "bangladesh s"[All Fields]                                                      | 26,722  |
| 4  | Bangladesh                                                | from 2010 - 2021 | ("bangladesh"[MeSH Terms] OR "bangladesh"[All Fields] OR "bangladesh s"[All Fields]) AND (2010:2021[pdat])                              | 19,005  |
| 5  | Rabies[Title/Abstract]                                    |                  | "Rabies"[Title/Abstract]                                                                                                                | 14,753  |
| 6  | Rabies[Title/Abstract]                                    | from 2010 - 2021 | ("Rabies"[Title/Abstract]) AND (2010:2021[pdat])                                                                                        | 4,921   |
| 7  | Rabies[MeSH Terms]                                        |                  | "rabies"[MeSH Terms]                                                                                                                    | 10,319  |
| 8  | Rabies[MeSH Terms]                                        | from 2010 - 2021 | ("rabies"[MeSH Terms]) AND (2010:2021[pdat])                                                                                            | 2,626   |
| 9  | Bangladesh[Title/Abstract]                                |                  | "Bangladesh"[Title/Abstract]                                                                                                            | 15,140  |
| 10 | Bangladesh[Title/Abstract]                                | from 2010 - 2021 | ("Bangladesh"[Title/Abstract]) AND (2010:2021[pdat])                                                                                    | 9,960   |
| 11 | (Rabies[Title/Abstract]) AND (Bangladesh[Title/Abstract]) |                  | "Rabies"[Title/Abstract] AND "Bangladesh"[Title/Abstract]                                                                               | 29      |
| 12 | (Rabies[Title/Abstract]) AND (Bangladesh[Title/Abstract]) | from 2010 - 2021 | ("Rabies"[Title/Abstract] AND "Bangladesh"[Title/Abstract]) AND (2010:2021[pdat])                                                       | 25      |
| 13 | (rabies) AND (Bangladesh)                                 |                  | ("rabies"[MeSH Terms] OR "rabies"[All Fields]) AND ("bangladesh"[MeSH Terms] OR "bangladesh"[All Fields] OR "bangladesh s"[All Fields]) | 39      |

|    |                                                       |                  |                                                                                                                                                                |    |
|----|-------------------------------------------------------|------------------|----------------------------------------------------------------------------------------------------------------------------------------------------------------|----|
| 14 | (rabies) AND (Bangladesh)                             | from 2010 - 2021 | ("rabies"[MeSH Terms] OR "rabies"[All Fields]) AND ("bangladesh"[MeSH Terms] OR "bangladesh"[All Fields] OR "bangladesh s"[All Fields])) AND (2010:2021[pdat]) | 30 |
| 15 | (rabies[Title/Abstract]) AND (Bangladesh)             |                  | "rabies"[Title/Abstract] AND ("bangladesh"[MeSH Terms] OR "bangladesh"[All Fields] OR "bangladesh s"[All Fields])                                              | 36 |
| 16 | (rabies[Title/Abstract]) AND (Bangladesh)             | from 2010 - 2021 | ("rabies"[Title/Abstract] AND ("bangladesh"[MeSH Terms] OR "bangladesh"[All Fields] OR "bangladesh s"[All Fields])) AND (2010:2021[pdat])                      | 27 |
| 17 | ((rabies[MeSH Terms]) AND (Bangladesh))               |                  | "rabies"[MeSH Terms] AND ("bangladesh"[MeSH Terms] OR "bangladesh"[All Fields] OR "bangladesh s"[All Fields])                                                  | 22 |
| 18 | ((rabies[MeSH Terms]) AND (Bangladesh))               | from 2010 - 2021 | ("rabies"[MeSH Terms] AND ("bangladesh"[MeSH Terms] OR "bangladesh"[All Fields] OR "bangladesh s"[All Fields])) AND (2010:2021[pdat])                          | 16 |
| 19 | (rabies[MeSH Terms]) AND (Bangladesh[Title/Abstract]) |                  | "rabies"[MeSH Terms] AND "Bangladesh"[Title/Abstract]                                                                                                          | 18 |
| 20 | (rabies[MeSH Terms]) AND (Bangladesh[Title/Abstract]) | from 2010 - 2021 | ("rabies"[MeSH Terms] AND "Bangladesh"[Title/Abstract]) AND (2010:2021[pdat])                                                                                  | 15 |
