# Supplementary material
Source: HighWire-hosted journal article supplement (https://bmjopen.bmj.com/content/12/3/e056024)
Supplement: inline-supplementary-material-2 [file inline-supplementary-material-2.pdf]

Appendix 2- Pilot adapted search strategy for ScienceDirect, Hinari, PLOS, EMBASE, Web of Science, Scopus, Google Scholar and resulted number of literature (Literature Search performed: August 08, 2021)

| Source         | Search strategy                                                                                                                                                                                                                    | Resulted literature |
|----------------|------------------------------------------------------------------------------------------------------------------------------------------------------------------------------------------------------------------------------------|---------------------|
| ScienceDirect  | <ul style="list-style-type: none"> <li>• General: Rabies Bangladesh</li> <li>• Title/Abstract/Keywords: rabies AND Bangladesh</li> <li>• Year: 2010-21</li> </ul>                                                                  | 9                   |
| Hinari         | <ul style="list-style-type: none"> <li>• Title/Abstract: rabies Bangladesh - ((TitleCombined:("rabies")) OR (Abstract:(rabies))) AND ((TitleCombined:(Bangladesh)) OR (Abstract:(Bangladesh)))</li> <li>• Year: 2010-21</li> </ul> | 162                 |
| PLOS           | <ul style="list-style-type: none"> <li>• Title/Abstract: rabies Bangladesh - ((title:Rabies) OR (abstract:rabies)) AND ((title:bangladesh) OR (abstract:bangladesh))</li> <li>• Year: 2010-21</li> </ul>                           | 2                   |
| EMBASE         | rabies:ti,ab,kw AND bangladesh:ti,ab,kw AND [2010-2021]/py                                                                                                                                                                         | 27                  |
| Web of Science | (TS=(rabies)) AND TS=(bangladesh)                                                                                                                                                                                                  | 49                  |
| Scopus         | ( ABS ( rabies ) OR TITLE ( rabies ) OR KEY ( rabies ) ) AND ( ABS ( bangladesh ) OR TITLE ( bangladesh ) OR KEY ( bangladesh ) ) AND PUBYEAR > 2009 AND PUBYEAR < 2022                                                            | 49                  |
| Google Scholar | Keywords: Rabies AND Bangladesh<br>Custom range: 2010-2021<br>Page: 1-30, 20 results per page                                                                                                                                      | 600                 |
